# Supplementary material
Source: publisher figshare collection journal article supplement (https://sage.figshare.com/ndownloader/files/20020679)
Supplement: Supplementary file 1 [file 20020679]

|                                                        | ≤ 90-day survival |                           | > 90-day survival |                          |         |
|--------------------------------------------------------|-------------------|---------------------------|-------------------|--------------------------|---------|
| Parameter                                              | Av. data          | No.                       | Av. data          | No.                      | p-value |
| Age (years) <sup>2</sup>                               | 36                | 60 (54.8 – 65.3)          | 246               | 58 (48 – 64.5)           | 0.099   |
| Gender (male/female)                                   | 36                | 20/16                     | 243               | 146/97                   | 0.606   |
| <b>Etiology of liver disease</b>                       | 36                |                           | 243               |                          | 0.587   |
| Alcohol abuse                                          |                   | 12                        |                   | 72                       |         |
| NASH/ASH/NAFLD                                         |                   | 4/1/0                     |                   | 26/5/6                   |         |
| Cryptogen                                              |                   | 5                         |                   | 27                       |         |
| Hepatitis B/C/E                                        |                   | 0/4/0                     |                   | 5/20/1                   |         |
| PSC/PBC                                                |                   | 1/0                       |                   | 17/7                     |         |
| Drug related                                           |                   | 1                         |                   | 5                        |         |
| Autoimmune hepatitis                                   |                   | 2                         |                   | 6                        |         |
| Secondary sclerosing cholangitis                       |                   | 3                         |                   | 5                        |         |
| Other                                                  |                   | 3                         |                   | 41                       |         |
| <b>Clinical conditions</b>                             |                   |                           |                   |                          |         |
| AD/ACLF                                                | 36                | 20/16                     | 243               | 232/11                   | <0.001  |
| Inflammation (pos./neg.)                               | 36                | 20/16                     | 242               | 49/193                   | <0.001  |
| Ascites (pos./neg.)                                    | 36                | 15/21                     | 242               | 58/184                   | 0.024   |
| Hepatic encephalopathy                                 | 36                | 14/22                     | 242               | 31/211                   | <0.001  |
| Hepatorenal syndrome (pos./neg.)                       | 36                | 14/22                     | 242               | 23/219                   | <0.001  |
| Anemia (pos./neg.)                                     | 36                | 10/26                     | 243               | 52/191                   | 0.39    |
| <b>Comorbidities</b>                                   |                   |                           |                   |                          |         |
| Coronary heart disease                                 | 36                | 6/30                      | 228               | 14/228                   | 0.018   |
| Hypertension (pos./neg.)                               | 36                | 19/17                     | 243               | 111/132                  | 0.426   |
| Diabetes (pos./neg.)                                   | 36                | 10/26                     | 243               | 61/182                   | 0.731   |
| Chronic kidney disease                                 | 36                | 21/15                     | 243               | 44/199                   | <0.001  |
| Hepatocellular cancer (pos./neg.)                      | 36                | 3/33                      | 243               | 39/204                   | 0.227   |
| Alcohol abuse (neg./active/history of)                 | 36                | 21/3/12                   | 235               | 150/27/58                | 0.513   |
| <b>Established clinical scores predicting survival</b> |                   |                           |                   |                          |         |
| CHILD A/B/C                                            | 34                | 2/14/18                   | 210               | 89/89/32                 | <0.001  |
| MELD-Score                                             | 36                | 26.2 (± 8.6) <sup>1</sup> | 213               | 13 (8 – 17) <sup>2</sup> | <0.001  |

|                                            |    |                            |     |                                  |        |
|--------------------------------------------|----|----------------------------|-----|----------------------------------|--------|
| AD-Score <sup>1</sup>                      | 20 | 55.2 (±9.8)                | 183 | 46.7 (±10.2)                     | <0.001 |
| <b>Biomedical characteristics</b>          |    |                            |     |                                  |        |
| WBC (10 <sup>9</sup> /l) <sup>2</sup>      | 36 | 7.1 (5 – 11.4)             | 239 | 5.9 (4.3 – 7.9)                  | 0.017  |
| Sodium <sup>2</sup>                        | 33 | 138 (134 – 141)            | 238 | 139 (136 – 142)                  | 0.057  |
| Albumin (g/dl)                             | 25 | 2.8 (±0.48) <sup>1</sup>   | 157 | 3.5 (2.8 – 4.1) <sup>2</sup>     | <0.001 |
| Ferritin (µg/l) <sup>2</sup>               | 36 | 861 (244.3 – 1876.5)       | 243 | 190 (63.5 – 456)                 | <0.001 |
| Transferrin (mg/dl)                        | 32 | 102.1 (±46.4) <sup>1</sup> | 218 | 198.5 (137.5 – 262) <sup>2</sup> | <0.001 |
| Transferrin saturation (in %) <sup>2</sup> | 32 | 78 (27.3 – 92)             | 214 | 31 (18 – 52)                     | <0.001 |
| Iron (µg/dl) <sup>2</sup>                  | 33 | 74 (44 – 108)              | 234 | 78 (52.3 – 122.8)                | 0.366  |
| CRP (mg/dl) <sup>2</sup>                   | 33 | 3.6 (1.8 – 7.1)            | 152 | 1.8 (0.4 – 3.6)                  | <0.001 |
| AST (U/l) <sup>2</sup>                     | 31 | 79 (54.5 – 184.5)          | 212 | 54.4 (35.8 – 114)                | 0.01   |
| ALT (U/l) <sup>2</sup>                     | 35 | 40 (23 – 110)              | 214 | 42.5 (27.3 – 84.8)               | 0.749  |
| GGT (U/l) <sup>2</sup>                     | 36 | 115.5 (37 – 326.8)         | 213 | 122 (56 – 268)                   | 0.519  |
| Creatinine (mg/dl) <sup>2</sup>            | 36 | 1.4 (1 – 2.3)              | 209 | 0.9 (0.7 – 1.2)                  | <0.001 |
| Bilirubin (mg/dl) <sup>2</sup>             | 35 | 7.9 (2.6 – 16.3)           | 220 | 1.3 (0.7 – 2.8)                  | <0.001 |
| INR <sup>2</sup>                           | 36 | 1.9 (±0.5)                 | 215 | 1.2 (1.1 – 1.5)                  | <0.001 |
|                                            |    |                            |     |                                  |        |

**Supplemental Table 1: Demographic data and clinical conditions of included unmatched patients with end-stage liver disease based on 90-day survival (n=286).** Non-alcoholic steatohepatitis (NASH), alcoholic steatohepatitis (ASH), non-alcoholic fatty liver disease (NAFLD), primary sclerosing cholangitis (PSC), primary biliary cholangitis (PBC), acute decompensation (AD), acute on chronic liver failure (ACLF)

<sup>1</sup> Mean (± Std. deviation); <sup>2</sup> Median (1<sup>st</sup> – 3<sup>rd</sup> quartile)

|                                        | ≤ 90-day survival |                               | > 90-day survival |                          |         |
|----------------------------------------|-------------------|-------------------------------|-------------------|--------------------------|---------|
| Parameter                              | Av. data          | No.                           | Av. data          | No.                      | p-value |
| Age (years) <sup>2</sup>               | 36                | 60 (54.8 – 65.3) <sup>2</sup> | 36                | 57.1 (±8.8) <sup>1</sup> | 0.157   |
| Gender (male/female)                   | 36                | 20/18                         | 36                | 18/18                    | 0.637   |
| <b>Etiology of liver disease</b>       | 36                |                               | 36                |                          | 0.448   |
| Alcohol abuse                          |                   | 12                            |                   | 20                       |         |
| NASH/ASH/NAFLD                         |                   | 4/1/0                         |                   | 1/1/0                    |         |
| Cryptogen                              |                   | 5                             |                   | 4                        |         |
| Hepatitis B/C/E                        |                   | 0/4/0                         |                   | 0/5/0                    |         |
| PSC/PBC                                |                   | 1/0                           |                   | 0/0                      |         |
| Drug related                           |                   | 1                             |                   | 2                        |         |
| Autoimmun Hepatitis                    |                   | 2                             |                   | 1                        |         |
| Secondary sclerosing cholangitis       |                   | 3                             |                   | 0                        |         |
| Others                                 |                   | 3                             |                   | 2                        |         |
| <b>Clinical conditions</b>             |                   |                               |                   |                          |         |
| AD/ACLF                                | 36                | 20/16                         | 36                | 25/11                    | <0.001  |
| Inflammation (pos./neg.)               | 36                | 20/16                         | 36                | 20/16                    | 1       |
| Ascites (pos./neg.)                    | 36                | 15/21                         | 36                | 24/12                    | 0.033   |
| Hepatic encephalopathy                 | 36                | 14/22                         | 36                | 12/24                    | 0.624   |
| Hepatorenal syndrome (pos./neg.)       | 36                | 14/22                         | 36                | 11/25                    | 0.458   |
| Anemia                                 | 36                | 10/26                         | 36                | 12/24                    | 0.609   |
| <b>Comorbidities</b>                   |                   |                               |                   |                          |         |
| Coronary heart disease                 | 36                | 6/30                          | 36                | 1/35                     | 0.047   |
| Hypertension (pos./neg.)               | 36                | 19/17                         | 36                | 15/21                    | 0.345   |
| Diabetes (pos./neg.)                   | 36                | 10/26                         | 36                | 5/31                     | 0.147   |
| Chronic kidney disease                 | 36                | 21/15                         | 36                | 8/28                     | 0.002   |
| Hepatocellular cancer (pos./neg.)      | 36                | 3/33                          | 36                | 2/34                     | 0.643   |
| Alcohol abuse (neg./active/history of) | 36                | 21/3/12                       | 35                | 14/15/6                  | 0.003   |
| <b>Scores predicting survival</b>      |                   |                               |                   |                          |         |
| CHILD A/B/C                            | 34                | 2/14/18                       | 36                | 7/14/15                  | 0.224   |
| MELD-Score <sup>1</sup>                | 36                | 26.2 (± 8.6)                  | 34                | 20 (± 7.5)               | 0.003   |

|                                            |    |                              |    |                               |       |
|--------------------------------------------|----|------------------------------|----|-------------------------------|-------|
| AD-Score <sup>1</sup>                      | 20 | 55.2 (± 9.8)                 | 22 | 53.2 (± 8.7)                  | 0.493 |
| <b>Biomedical characteristics</b>          |    |                              |    |                               |       |
| WBC (10 <sup>9</sup> /l) <sup>2</sup>      | 36 | 7.1 (5 – 11.4)               | 36 | 6.8 (4.9 – 10.7)              | 0.757 |
| Sodium                                     | 33 | 138 (134 – 141) <sup>2</sup> | 36 | 135.5 (± 6) <sup>1</sup>      | 0.423 |
| Albumin (g/dl) <sup>1</sup>                | 25 | 2.8 (± 0.5)                  | 24 | 3.0 (± 0.9)                   | 0.257 |
| Ferritin (µg/l) <sup>2</sup>               | 36 | 861 (244.3 – 1876.5)         | 36 | 251.5 (85.8 – 995.3)          | 0.017 |
| Transferrin (mg/dl)                        | 32 | 102.1 (± 46.4) <sup>1</sup>  | 35 | 119 (76 – 191.5) <sup>2</sup> | 0.108 |
| Transferrin saturation (in %) <sup>2</sup> | 32 | 78 (27.3 – 92)               | 32 | 55 (21.8 – 82.5)              | 0.080 |
| Iron (µg/dl) <sup>2</sup>                  | 33 | 74 (44 – 108)                | 33 | 69 (47 – 116)                 | 0.918 |
| CRP (mg/dl)                                | 33 | 3.6 (1.8 – 7.1) <sup>2</sup> | 27 | 3.7 (± 2.6) <sup>1</sup>      | 0.444 |
| AST(U/l) <sup>2</sup>                      | 31 | 79 (54.5 – 184.5)            | 32 | 104 (56.3 – 199)              | 0.685 |
| ALT (U/l) <sup>2</sup>                     | 35 | 40 (23 – 110)                | 32 | 42.5 (27.8 – 102.75)          | 0.679 |
| GGT (U/l) <sup>2</sup>                     | 36 | 115.5 (37 – 326.8)           | 32 | 115.5 (48 – 207.3)            | 0.658 |
| Creatinine (mg/dl) <sup>2</sup>            | 36 | 1.4 (1 – 2.3)                | 33 | 1.1 (0.8 – 1.7)               | 0.048 |
| Bilirubin (mg/dl) <sup>2</sup>             | 35 | 7.9 (2.6 – 16.3)             | 33 | 4.40 (1.6 – 9.9)              | 0.133 |
| INR                                        | 36 | 1.9 (± 0.53) <sup>1</sup>    | 33 | 1.5 (1.3 – 1.7) <sup>2</sup>  | 0.014 |

**Supplemental Table 2: Propensity score matched demographic data and clinical conditions of the included patients with end-stage liver disease (n=72).** Non-alcoholic steatohepatitis (NASH), alcoholic steatohepatitis (ASH), non-alcoholic fatty liver disease (NAFLD), primary sclerosing cholangitis (PSC), primary biliary cholangitis (PBC), acute decompensation (AD), acute on chronic liver failure (ACLF

<sup>1</sup> Mean (± Std. deviation); <sup>2</sup> Median (1<sup>st</sup> – 3<sup>rd</sup> quartile)

**Subgroup analysis of the effect of alcohol abuse upon serum ferritin levels of patients with end stage liver disease.**

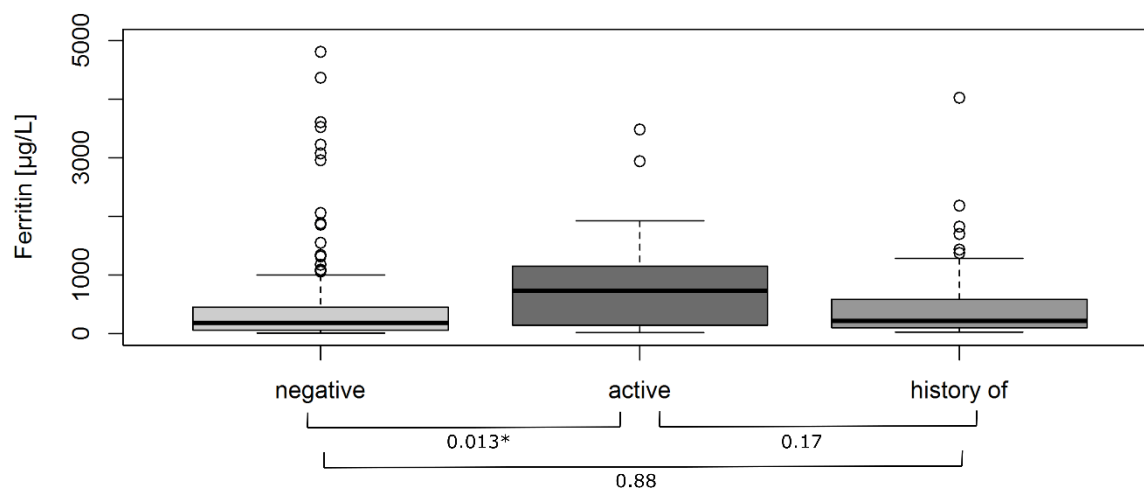

**Supplemental Figure 1:** Differences in serum ferritin levels of end-stage liver disease patients based upon alcohol abuse in unmatched analysis. Patients were grouped in patients with no, with active and with a history of alcohol abuse. Pairwise comparisons of serum ferritin levels based upon subgroups of alcohol abuse. There was a significant difference between the serum ferritin value of patients with active alcohol abuse compared to patients with no alcohol abuse ( $p=0.013$ ). The Y-axis has been limited to a maximum value of 5000 µg/L to allow for better visualization.

## Analysis based on hyperferritinemia

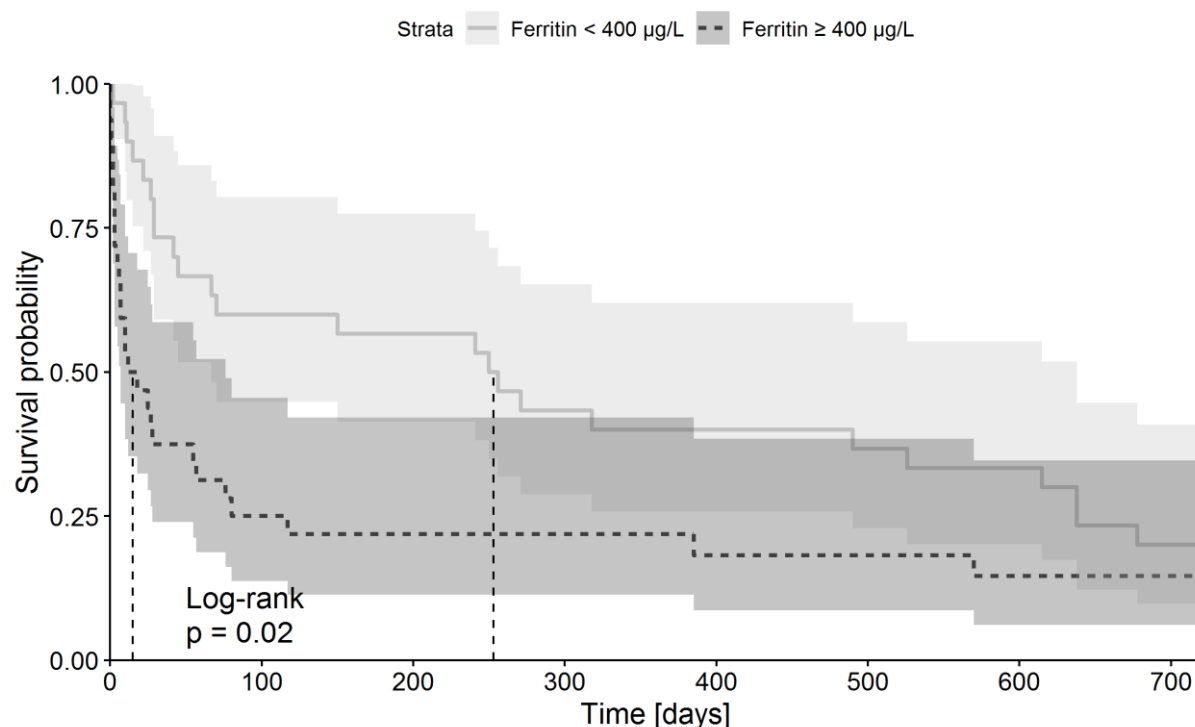

**Supplemental Figure 2:** Overall survival based on hyperferritinemia. The cutoff for hyperferritinemia was chosen based on the upper reference limit of our laboratory. Statistically significant differences between both groups can be demonstrated over the two-year observational period ( $p=0.02$ ). Vertical lines indicate median survival (serum ferritin level  $>400\text{ }\mu\text{g/L}$ : 15 days; serum ferritin level  $<400\text{ }\mu\text{g/L}$ : 253 days). Shaded areas represent the 95% confidence interval.

| Parameter                                      | Survival (%) | 95% CI (lower – upper) |
|------------------------------------------------|--------------|------------------------|
| Serum ferritin $\leq 400\text{ }\mu\text{g/L}$ | 60%          | 44.8% - 80.4%          |
| Serum ferritin $> 400\text{ }\mu\text{g/L}$    | 25%          | 13.7% - 45.5%          |

**Supplemental Table 3:** 90-day survival expressed as percentage values including lower and upper 95% confidence intervals.

## Overview of currently published studies evaluating the role of ferritin and transferrin for the outcome of patients with end-stage liver disease (ESLD).

| Author, year (Ref No.)       | Study design         | No of patients included (n) | Parameter | Study Titel                                                                                                                                 | Results                                                                                                                                                                                                                                                                                                                                                                     |
|------------------------------|----------------------|-----------------------------|-----------|---------------------------------------------------------------------------------------------------------------------------------------------|-----------------------------------------------------------------------------------------------------------------------------------------------------------------------------------------------------------------------------------------------------------------------------------------------------------------------------------------------------------------------------|
| Walker 2010 <sup>1</sup>     | Retrospective cohort | 322                         | SF        | SF concentration predicts mortality in patients awaiting LT                                                                                 | - SF $\geq 200$ $\mu\text{g/L}$ independent risk factor for significantly increased 1-y mortality in patients awaiting LT ( $p=0.01$ )                                                                                                                                                                                                                                      |
| Weismüller 2011 <sup>2</sup> | Retrospective cohort | 410                         | SF        | SF concentration and transferrin saturation before LT predict decreased long-term recipient survival                                        | - Patients with a SF $\geq 365$ $\mu\text{g/L}$ before LT had a significant lower overall survival following LT than patients with a SF $< 365$ $\mu\text{g/L}$ (61.1% vs. 74.4%; $p<0.01$ )                                                                                                                                                                                |
| Al-Freah 2013 <sup>3</sup>   | Retrospective cohort | 1079                        | SF        | The association of pretransplant ferritin level with waiting list and post-transplant survival. Does ferritin actually predict outcome?     | - ESLD patients with a SF $> 300$ $\mu\text{g/L}$ had a significantly increased 3-, 6- and 12-month mortality compared to ESLD patients with a SF $\leq 300$ $\mu\text{g/L}$ (18.4%; 28.0% and 33.4% vs. 9.7%, 15.4% and 21.5%; all $p<0.001$ )                                                                                                                             |
| Maiwall 2014 <sup>4</sup>    | Retrospective cohort | 318                         | SF        | SF predicts early mortality in patients with decompensated cirrhosis                                                                        | - SF ( $\geq 200$ $\mu\text{g/L}$ ) was a significant predictor of early mortality (15-d and 30-d) in patients decompensated cirrhosis ( $p<0.05$ )                                                                                                                                                                                                                         |
| Wu 2014 <sup>5</sup>         | Prospective cohort   | 172                         | SF        | SF concentration predicts mortality in patient with hepatitis B virus-related acute-on-chronic liver failure                                | - Patients with hepatitis b virus-related acute-on-chronic liver failure and elevated SF levels ( $> 500$ $\mu\text{g/L}$ ) had a significant higher 3-month mortality rate than patients with lower SF levels ( $p<0.01$ )<br>- The AUROCs for 3-month mortality were 0.64 for SF ( $p<0.01$ ) and 0.91 for MELD+SF ( $p<0.001$ )                                          |
| Maras 2015 <sup>6</sup>      | Prospective cohort   | 160                         | SF/ST     | Dysregulated iron homeostasis is strongly associated with multiorgan failure and early mortality in acute-on-chronic liver failure          | - Lower ST levels were found in patients with acute-on-chronic liver failure (with and without multi-organ failure) compared to patients with compensated cirrhosis and healthy controls ( $p<0.01$ )<br>- Higher SF levels were found in patients with acute-on-chronic liver failure with multi-organ failure compared to those without and healthy controls ( $p<0.05$ ) |
| Ripoll 2015 <sup>7</sup>     | Retrospective cohort | 51                          | SF        | SF in patients with cirrhosis is associated with markers of liver insufficiency and circulatory dysfunction, but not of portal hypertension | - SF was not associated with prolonged survival in patients with liver cirrhosis in univariate analysis ( $p$ value not provided)<br>- SF levels were not different in liver cirrhosis patients who died compared to patients who were still alive at the end of follow-up ( $p$ value not provided)                                                                        |
| Beer 2015 <sup>8</sup>       | Retrospective cohort | 405                         | SF        | Etiologies and short-term mortality in                                                                                                      | - Patients with an acute liver injury and SF values $> 5000$ $\mu\text{g/L}$ have a 30-d                                                                                                                                                                                                                                                                                    |

|                                    |                      |      |       |                                                                                                                     |                                                                                                                                                                                                                                                                                                                                                                                                                                          |
|------------------------------------|----------------------|------|-------|---------------------------------------------------------------------------------------------------------------------|------------------------------------------------------------------------------------------------------------------------------------------------------------------------------------------------------------------------------------------------------------------------------------------------------------------------------------------------------------------------------------------------------------------------------------------|
|                                    |                      |      |       | patients with ultraelevated SF                                                                                      | mortality of 33% and a 6-month mortality of 39%                                                                                                                                                                                                                                                                                                                                                                                          |
| Hagström 2016 <sup>9</sup>         | Retrospective cohort | 222  | SF    | Elevated SF is associated with increased mortality in non-alcoholic fatty liver disease after 16 y of follow-up     | - High SF cutoff values (men >350 µg/L; women >150 µg/L) showed an increased mortality 15 y after diagnosis in patients with non-alcoholic fatty liver disease (hazard ratio 1.1 per y; p<0.05)                                                                                                                                                                                                                                          |
| Anastasiou 2017 <sup>10</sup>      | Retrospective cohort | 102  | SF/ST | Low transferrin and high ferritin concentrations are associated with worse outcome in acute liver failure           | - Patients with SF >1510 µg/L had a significant higher mortality in patients with acute liver failure compared to patients with SF <1510 µg/L (p<0.0001)<br>- Patients with ST <155 mg/dL had a significant higher mortality in patients with acute liver failure compared to patients with ST >155 mg/dL (p<0.0001)<br>- The AUROC for 90-d survival were 0.80 for SF, 0.87 for ST, 0.89 for MELD+SF and 0.95 for MELD+ST (all p<0.002) |
| Bruns 2017 <sup>11</sup>           | Prospective cohort   | 292  | SF/ST | Low ST correlates with acute-on-chronic organ failure and indicates short-term mortality in decompensated cirrhosis | - 90-d non-survivors presented with higher SF (p=0.03) and lower ST (p=0.02)<br>- The AUROCs for 30-d mortality were 0.68 for ST (p=0.003) and 0.75 for MELD+ST (p value not provided)                                                                                                                                                                                                                                                   |
| Oikonomou 2017 <sup>12</sup>       | Retrospective cohort | 192  | SF    | High SF is associated with worse outcome of patients with decompensated cirrhosis                                   | - SF was an independent risk factor for mortality (HR 1.001; p=0.005)<br>- SF had a low discriminative ability to the outcome of patients with decompensated cirrhosis (AUROC of 0.61)<br>- Patients with cut-off SF >55 µg/L had a worse outcome (p=0.001)                                                                                                                                                                              |
| Umer 2017 <sup>13</sup>            | Prospective cohort   | 132  | SF    | SF as a predictor for 30-d mortality in patients of decompensated chronic liver disease                             | - Patients with elevated SF levels had a significantly increased 30-d mortality (SF <200 µg/L: 0% mortality; SF 200-400 µg/L: 50% mortality; SF >400 µg/L: 93% mortality; p<0.001)                                                                                                                                                                                                                                                       |
| Viveiros 2018 <sup>14</sup>        | Retrospective cohort | 1851 | ST    | Transferrin as a predictor of survival in cirrhosis                                                                 | - In ESLD patients with ST <180mg/dL, 3-month, 1-y, and 5-y transplant-free survival rates were significantly lower (92%, 79% and 31%) compared to ESLD patients with ST ≥180 mg/dL (99%, 96% and 68%; all p<0.001)                                                                                                                                                                                                                      |
| Ribot-Hernandez 2019 <sup>15</sup> | Prospective cohort   | 238  | SF/ST | Prognostic value of serum iron, ferritin and transferrin in chronic alcoholic liver disease                         | - ST was significantly associated with survival of patients with chronic alcoholic liver disease (p<0.05 in log-rank test)<br>- No association was found between SF and survival of patient with chronic alcoholic liver disease (p value not provided)                                                                                                                                                                                  |

**Supplemental Table 4: Overview of currently published studies evaluating the role of ferritin and transferrin for the outcome of patients with end-stage liver disease (ESLD).**

After performing a systematic literature search in an electronic database (database: NCBI



pubmed; search items “ferritin AND outcome AND liver”, “transferrin AND outcome AND liver”, “ferritin AND survival AND liver” and “transferrin AND survival AND liver”; date of search: 29/09/2019) 1112 records were identified. After removing duplicates, 925 records were checked for evaluating the role of ferritin and transferrin for the outcome of ESLD patients. Finally, 15 records could be identified. Exclusion of records: Non-English language, case reports, case series, abstracts only, congress abstracts, reviews and animal studies. Abbreviations: D=day; y=year; AUROC=area under the receiver operating characteristic; SF=serum ferritin; ST=serum transferrin; ESLD=end-stage liver disease; LT=liver transplantation; MELD=Model of end-stage liver disease.

## REFERENCES:

1. Walker NM, Stuart KA, Ryan RJ, et al. Serum ferritin concentration predicts mortality in patients awaiting liver transplantation. *Hepatology*. 2010; 51: 1683-91.
2. Weismuller TJ, Manns MP and Strassburg CP. Ferritin and liver allocation? Impact on mortality not only on the waiting list but also after orthotopic liver transplantation should be considered. *Hepatology*. 2010; 52: 392-3; author reply 3.
3. Al-Freah MA, Kriese S, Foxton MR, et al. The association of pretransplant ferritin level with waiting list and post-transplant survival. Does ferritin actually predict outcome? *Transpl Int*. 2013; 26: 1070-9.
4. Maiwall R, Kumar S, Chaudhary AK, et al. Serum ferritin predicts early mortality in patients with decompensated cirrhosis. *J Hepatol*. 2014; 61: 43-50.
5. Wu J, Chen L, Chen Y, Yang J and Wu D. Serum ferritin concentration predicts mortality in patients with hepatitis B virus-related acute on chronic liver failure. *Arch Med Res*. 2014; 45: 251-6.
6. Maras JS, Maiwall R, Harsha HC, et al. Dysregulated iron homeostasis is strongly associated with multiorgan failure and early mortality in acute-on-chronic liver failure. *Hepatology*. 2015; 61: 1306-20.
7. Ripoll C, Keitel F, Hollenbach M, Greinert R and Zipprich A. Serum Ferritin in Patients With Cirrhosis is Associated With Markers of Liver Insufficiency and Circulatory Dysfunction, but Not of Portal Hypertension. *J Clin Gastroenterol*. 2015; 49: 784-9.
8. Beer T and Vadakara J. Etiologies and Short-Term Mortality in Patients with Ultraelevated Serum Ferritin. *South Med J*. 2015; 108: 574-8.
9. Hagstrom H, Nasr P, Bottai M, et al. Elevated serum ferritin is associated with increased mortality in non-alcoholic fatty liver disease after 16 years of follow-up. *Liver Int*. 2016; 36: 1688-95.
10. Anastasiou OE, Kalsch J, Hakmouni M, et al. Low transferrin and high ferritin concentrations are associated with worse outcome in acute liver failure. *Liver Int*. 2017; 37: 1032-41.
11. Bruns T, Nuraldeen R, Mai M, et al. Low serum transferrin correlates with acute-on-chronic organ failure and indicates short-term mortality in decompensated cirrhosis. *Liver Int*. 2017; 37: 232-41.
12. Oikonomou T, Goulis I, Soulaïdopoulos S, et al. High serum ferritin is associated with worse outcome of patients with decompensated cirrhosis. *Ann Gastroenterol*. 2017; 30: 217-24.
13. Umer N, Makki MU, Kiran SK and Jadoon NA. Serum ferritin as a predictor of 30 days mortality in Patients of decompensated chronic liver disease. *J Ayub Med Coll Abbottabad*. 2017; 29: 415-8.
14. Viveiros A, Finkenstedt A, Schaefer B, et al. Transferrin as a predictor of survival in cirrhosis. *Liver Transpl*. 2018; 24: 343-51.
15. Ribot-Hernandez I, Martin-Gonzalez C, Vera-Delgado V, et al. Prognostic Value of Serum Iron, Ferritin, and Transferrin in Chronic Alcoholic Liver Disease. *Biol Trace Elem Res*. 2019.
